# Supplementary material for: Induction of interleukin-8 preserves the angiogenic response in HIF-1α–deficient colon cancer cells
Source: Springer Nature journal article supplement (doi:10.1038/nm1294), 2005-08-26
Supplement: nm1294-S6.pdf [file nm1294-S6.pdf]

Supplementary Table  
Hypoxic gene expression patterns in  
DLD-1 cells with or without HIF-1.

| Fragment name | Gene                                              | Fold induction<br>by hypoxia | Change in hypoxic induction<br>by HIF knock-down (%) |
|---------------|---------------------------------------------------|------------------------------|------------------------------------------------------|
| 210512_s_at   | VEGF-A                                            | 4.0                          | -10.6                                                |
| 205463_s_at   | PDGFA                                             | 2.2                          | 103.3                                                |
| 204200_s_at   | PDGFB                                             | 0.7                          | 35.1                                                 |
| 204421_s_at   | basic FGF                                         | 1.1                          | -84.6                                                |
| 204422_s_at   | FGF2                                              | 0.5                          | -86.6                                                |
| 205608_s_at   | angiopoietin-1                                    | 0.9                          | -26.6                                                |
| 202023_at     | Ephrin A1                                         | 2.5                          | -15.7                                                |
| 205016_at     | TGF- $\alpha$                                     | 1.2                          | -44.9                                                |
| 209747_at     | TGF- $\beta$ 3                                    | 1.6                          | -19.3                                                |
| 202859_x_at   | interleukin-8                                     | 0.8                          | 81.2                                                 |
| 210037_s_at   | inducible nitric oxide synthase                   | 2.3                          | -7.8                                                 |
| 205141_at     | angiogenin                                        | 4.0                          | 14.4                                                 |
| 200785_s_at   | low density lipoprotein-related protein-1 (LRP1)  | 0.6                          | -14.4                                                |
| 201809_s_at   | endoglin (ENG)                                    | 6.9                          | -65.7                                                |
| 202912_at     | adrenomedullin (ADM)                              | 3.5                          | -24.4                                                |
| 203666_at     | stromal cell-derived factor-1 (SDF-1)             | 2.1                          | -38.8                                                |
| 207094_at     | interleukin 8 receptor, $\alpha$ (IL8RA, CXCR1) * | 0.8                          | -19.2                                                |
| 207008_at     | interleukin 8 receptor, $\beta$ (IL8RB, CXCR2) *  | 2.8                          | -74.0                                                |

\*expression level in normoxia categorized as "absent"
